1  
2  
3  
4  
5  
6  
7  
8  
9  
10  
11  
12  
13  
14  
15  
16  
17  
18  
19  
20  
21  
22  
23  
24  
25

**Influence of delayed density and ultraviolet radiation on caterpillar granulovirus infection and mortality**

<sup>1,2,\*</sup> Adam Pepi, <sup>2</sup>Vincent Pan, and <sup>2</sup>Richard Karban

<sup>1</sup>Graduate Group in Ecology, University of California, Davis, CA 95616

<sup>2</sup>Department of Entomology & Nematology, University of California, Davis, CA 95616

\* Corresponding author. Email: adampepi@gmail.com

**Keywords:**

Arctiinae; baculovirus; Bodega Marine Lab; disease dynamics; latitudinal gradient; population cycles

26

27 **Abstract**

- 28 1. Infectious disease is an important potential driver of population cycles, but this must occur  
29 through delayed density-dependent infection and resulting fitness effects. Delayed density-  
30 dependent infection by baculoviruses can be caused by environmental persistence of viral oc-  
31 clusion bodies, which can be influenced by environmental factors. In particular, ultraviolet radi-  
32 ation is potentially important in reducing the environmental persistence of viruses by inactivat-  
33 ing viral occlusion bodies.
- 34 2. Delayed density-dependent viral infection has rarely been observed empirically at the popula-  
35 tion level although theory predicts that it is necessary for these pathogens to drive population  
36 cycles. Similarly, field studies have not examined the potential effects of ultraviolet radiation  
37 on viral infection rates in natural animal populations. We tested if viral infection is delayed den-  
38 sity-dependent with the potential to drive cyclic dynamics and if ultraviolet radiation influences  
39 viral infection.
- 40 3. We censused 18 moth populations across nearly 9° of latitude over two years and quantified the  
41 effects of direct and delayed density and ultraviolet radiation on granulovirus infection rate, in-  
42 fection severity, and survival to adulthood. Caterpillars were collected from each population in  
43 the field and reared in the laboratory.
- 44 4. We found that infection rate, infection severity, and survival to adulthood exhibited delayed  
45 density-dependence. Ultraviolet radiation in the previous summer decreased infection severity,  
46 and increased survival probability of the virus. Structural equation modelling found that the ef-  
47 fect of lagged density on moth survival was mediated through infection rate and infection sever-  
48 ity, and was 2.5 fold stronger than the effect of ultraviolet radiation on survival through infec-  
49 tion severity.

50 5. Our findings provide clear evidence that delayed density dependence can arise through viral in-  
51 fection rate and severity in insects, which supports the role of viral disease as a potential mech-  
52 anism, among others, that may drive insect population cycles. Furthermore, our findings sup-  
53 port predictions that ultraviolet radiation can modify viral disease dynamics in insect popula-  
54 tions, most likely through attenuating viral persistence in the environment.

## 55 **Introduction**

56 Infectious disease plays an important role in population dynamics, potentially regulating  
57 populations and driving cycles. Many insect populations undergo dramatic cyclic fluctuations, and  
58 cyclic, delayed density-dependent disease outbreaks have been proposed as an explanation (Anderson  
59 & May, 1980, 1981). However, many other mechanisms have also been proposed to explain insect  
60 population cycles (Myers & Cory, 2013), particularly specialist parasitoids (Berryman, 1996). For  
61 some species of Lepidoptera, empirical evidence has suggested that baculoviruses are most likely the  
62 cause of cyclicality (Myers, 2000; Myers & Cory, 2013, 2016), though this has not been formally tested.

63 Delayed density-dependent feedbacks are required to drive cyclic population dynamics  
64 (Turchin, 2003). Detection of delayed density-dependence involving many ecological factors has been  
65 common (Turchin, 1990), and there have been several observations that viral epizootics follow high  
66 densities of some insect species (Cory & Myers, 2003; Fuxa, 2004; Myers, 2000; Myers & Cory,  
67 2016). However, direct demonstrations of delayed density-dependent viral infection rate and infection-  
68 induced mortality are less common (Burthe et al., 2006; Fleming, Kalkmakoff, Archibald, & Stewart,  
69 1986; Rothman, 1997). Observational studies over relatively small areas (>15km) using space-for-time  
70 substitutions of local densities have shown delayed density-dependent incidence of viral infection in  
71 voles (Burthe et al., 2006) and soil-dwelling hepialid caterpillars (Fleming et al., 1986). Experimental  
72 manipulation of western tent caterpillar (*Malacosoma californicum pluviale*) densities at the tree level  
73 showed delayed density-dependent infection rates by a nucleopolyhedrovirus (Rothman, 1997).

74 Besides host density, other aspects of the local environment may affect viral transmission and  
75 dynamics in the field (Cory & Myers, 2003). In particular, ultraviolet radiation has been shown to  
76 inactivate viruses of all kinds (Sagripanti & Lytle, 2007), including baculovirus occlusion bodies  
77 (Griego, Martignoni, & Claycomb, 1985; Witt & Stairs, 1975). In field studies, examination of the  
78 presence of baculovirus occlusion bodies on shaded vs. unshaded foliage suggested that sunlight on  
79 leaves may inactivate viruses (Olofsson, 1988). A study of baculovirus transmission in forest tent  
80 caterpillars (*Malacosoma disstria*) found depressed transmission rates on forest edges as opposed to the  
81 forest interior, which was attributed to sunlight inactivating virus on leaves at forest edges (Roland &  
82 Kaupp, 1995). A field study of two strains of gypsy moth NPV showed variable resistance of virus to  
83 ultraviolet, in which inactivation rate from ambient ultraviolet was greater in a more potent strain than  
84 a less potent one (Akhanaev et al., 2017). In another study of forest tent caterpillars using tree ring  
85 analyses, it was suggested periods of weaker ultraviolet radiation increased the effect of forest tent  
86 caterpillar outbreaks on tree growth (Haynes, Tardif, & Parry, 2018). In this example, less ultraviolet  
87 radiation may have allowed better viral persistence and transmission and produced more severe  
88 caterpillar outbreaks.

89 In the present study, we examined the effects of host density, delayed-density dependence, and  
90 ultraviolet radiation on the survival, infection rate, and infection severity of an undescribed  
91 granulovirus (see supplement) in Ranchman's tiger moth (*Arctia virginalis*). Ranchman's tiger moth  
92 (Erebidae:Arctiinae) is a univoltine species with a long larval stage – usually lasting from late summer  
93 until the following spring. Pupation occurs in late spring, and adults emerge in early summer, mate and  
94 lay eggs during the summer. Larvae hatch mid-summer, and feed cryptically in litter and undergrowth  
95 until they become larger in winter months. Caterpillars are generalists and feed on a variety of  
96 herbaceous plants, with a preference for alkaloid-containing hosts (Karban, Karban, Huntzinger,  
97 Pearse, & Cruisinger, 2010), and occur mostly in open grassland, shrubland, or savannah. Caterpillars  
98 are parasitized by tachinid parasitoids, though caterpillars sometimes survive parasitism (English-Loeb,

99 Karban, & Brody, 1990). Parasitism has been found to have little role in population dynamics, leaving  
100 the observed oscillatory dynamics largely unexplained (Karbon & de Valpine, 2010). Caterpillars also  
101 sometimes show symptoms of granulovirus infection, which include poor growth, inactivity, watery,  
102 opaque frass, regurgitation of milky fluid, and death. Granulovirus is a dsDNA virus that persists  
103 outside of the host in the environment within a protective protein shell as an occlusion body (OB) .  
104 Horizontal transmission can occur when caterpillars consume OBs on food sources, which dissolve in  
105 caterpillars' alkaline gut and release infective virus particles (Vega & Kaya, 2012). Virus particles infect  
106 the caterpillar starting from the epithelial tissue and then move to other parts of the body, including the  
107 trachea, fat bodies, and hemolymph (Barrett, Brownwright, Primavera, & Palli, 1998), potentially  
108 causing death of the caterpillar. In Ranchman's tiger moth (*Arctia virginalis*), granulovirus, like  
109 parasitoids, does not uniformly kill its hosts.

110 To test the potential role of granulovirus in delayed-density dependent population dynamics in  
111 Ranchmans' tiger moth and the influence of ultraviolet radiation on the persistence and transmission of  
112 virus in moth populations, we censused 18 populations over two years along a gradient of latitude and  
113 ultraviolet radiation and reared caterpillars from these populations in the laboratory. To identify the  
114 mechanisms through which granulovirus affects moth population dynamics, we measured granulovirus  
115 infection rate, severity, and survival of caterpillars to adulthood. We analyzed the effect of caterpillar  
116 density and ultraviolet radiation at the study sites on viral infection and survival. We also tested if viral  
117 infection mediated the effects of caterpillar density and ultraviolet radiation on caterpillar survival  
118 using a structural equation model.

## 119 **Methods**

### 120 *Censuses*

121 Caterpillars were counted visually along 4 m wide linear transects of varying length (78-300m)  
122 at 18 sites along a ~1000 km latitudinal gradient of the Pacific coast in California, Oregon, and  
123 Washington (Figure 1). Transects were surveyed in 2019 and 2020, starting from 1 March through 30

124 May. We visited sites in each year from south to north, in accordance with the phenology of caterpillar  
125 development so that caterpillars were surveyed when most were 4<sup>th</sup> or 5<sup>th</sup> instars (sampling dates in  
126 Table S1). Transects were surveyed at a constant walking speed and all by the same observer (A. Pepi).  
127 Density was estimated from caterpillar counts over the transect area (4m x length). During the second  
128 year, sites were revisited within ten days from the calendar date of the first visit; however, this species  
129 is a slow-growing caterpillar (roughly ten month development period), so density estimates were likely  
130 not overly sensitive to small deviations in sampling date. In 2020, up to ca-. 30 caterpillars per site (or  
131 less if fewer were found) were collected haphazardly and brought back to the laboratory for rearing.

### 132 *Rearing*

133 Caterpillars were reared individually in 6 oz plastic souffle cups with fabric lids and kept in an  
134 incubator at 18 °C and 75% RH. Caterpillars were fed every 3-4 days with washed organic romaine  
135 lettuce and yellow bush lupine (*Lupinus arboreus*) leaves collected from a part of Bodega Marine  
136 Reserve without *Arctia virginalis*. Parasitoids that emerged from caterpillars were counted and  
137 identified to family. Caterpillars that died during rearing were frozen at -20 °C for subsequent  
138 dissection, except for those that clearly died due to emerged parasitoids. Caterpillars were reared until  
139 pupation (~50 days), and pupae were placed together by site of origin (no more than ~10 per site) in 30  
140 cm x 30 cm flight cages and allowed to emerge as moths, at room temperature. Pupae and moths were  
141 reared until one month after the last moth emerged and sprayed once or twice weekly with water to  
142 prevent desiccation. Adults do not feed. Dead pupae and moths were stored dry at room temperature  
143 for subsequent dissection. Individuals that reached adulthood fully formed were counted as having  
144 survived; individuals that died as caterpillars or failed to emerge from pupae or expand wings were  
145 counted as not surviving.

### 146 *Dissection and viral assays*

147 After death, each individual was dissected to assess infection status. Two to six tissue samples  
148 per insect were taken from the abdomen of adults and pupae or fat bodies of caterpillars, broken up

149 with forceps, smeared on a glass slide with water, and examined under a light microscope at 200x  
150 magnification with phase contrast. Visible occlusion bodies (OB) ( $<0.15\mu\text{m}$ ) were confirmed by  
151 adding a drop of 1 M NaOH to the slide, which dissolves the viral protein coat, turning the OB  
152 transparent (Lacey & Solter, 2012)(Figure S1). Tissue samples were taken until a positive NaOH test  
153 was obtained; if no virus was found after six tissue samples, individuals were classified as uninfected  
154 (see supplemental methods for more detail).

155 Infection severity was rated as uninfected, low, medium, high, or very high, based on the  
156 number of samples required to discover virus, the density of OBs in tissue smear samples, and the  
157 coloration of hemolymph and fat body (Figure S2). Low severity infections took many samples to  
158 identify and had low densities of OBs. Medium severity infections took fewer samples to identify and  
159 had moderate densities of OBs. High severity samples had infections in all samples with high densities  
160 of OBs, with organ systems in the body still intact and identifiable. Very high severity infections had  
161 infections in all samples with very high densities of OBs, with internal organ systems unidentifiable.

#### 162 *Ultraviolet irradiation*

163 Daily values for ultraviolet radiation in 2019, specifically 'Erythemal Daily Dose' in Watts/m<sup>2</sup>  
164 from OMI/Aura satellite data were accessed from NASA GES DISC (Hovila, Arola, & Tamminen,  
165 2014). Values were extracted for each sampling location and the average value calculated from 360 to  
166 180 days before the collection date of caterpillars (~March-September at most sites; see Table S1 for  
167 collection dates). This timing coincided with the season during which viral OBs would have persisted  
168 in the environment outside of hosts.

#### 169 *Statistical analysis*

170 First, we analyzed the density-dependence of infection rate (proportion of infected individuals)  
171 and the influence of ultraviolet radiation on infection rate. The proportion of all individuals (N=208)  
172 that were infected was analyzed in response to log caterpillar density per m<sup>2</sup> from transects in 2019  
173 (density in the previous year) and 2020 (density in the same year) using beta-binomial generalized

174 linear mixed models with site as a random effect. To test for the effect of ultraviolet radiation, we  
175 implemented a model with both ultraviolet radiation and log density, to control for the effect of density  
176 on infection rate.

177 Second, we analyzed the density-dependence of infection severity, and the influence of  
178 ultraviolet radiation on infection severity. We analyzed infection severity (N=198 with severity rated)  
179 in response to log density (same year and previous year) using cumulative link mixed models with site  
180 as a random effect. As before, to test for the effect of ultraviolet radiation, we implemented a model  
181 with both ultraviolet radiation and log density, to control for the effect of density on infection severity.  
182 To test for effects of density and ultraviolet on infection severity independent of infection status, we  
183 implemented models using only infected individuals (N=184). This allowed us to test whether different  
184 processes influenced infection rate vs. infection severity. We implemented cumulative link mixed  
185 models with only log density, and both log density and ultraviolet radiation as predictors as before.

186 Third, we tested for density-dependent survival and effects of ultraviolet radiation on survival.  
187 We analyzed survival to emergence as fully formed moths (N=208) in response to caterpillar density,  
188 tachinid parasitoid load, and ultraviolet radiation in a beta-binomial generalized linear mixed model  
189 with site as a random effect.

190 Lastly, we tested our structural hypothesis that viral infection and infection severity were the  
191 mechanisms through which lagged density and ultraviolet radiation affected survival in moth  
192 populations. There are multiple possible pathways through which density, ultraviolet radiation,  
193 infection rate, and infection severity might influence survival and thus population dynamics. To test  
194 our specific structural hypothesis, we constructed a piecewise structural equation model which tested  
195 whether infection rate and infection severity mediated the effects of ultraviolet radiation and caterpillar  
196 density on survival. To do this, we transformed infection severity into a continuous variable between 0  
197 and 1, by converting to numerical categories from 1-5, dividing by 5, and subtracting 0.1. We  
198 constructed 3 component sub-models of our structural equation model: a beta-binomial model of



199 infection rate predicted by log density and ultraviolet radiation, a beta model of infection severity rate  
200 predicted by infection rate, log density and ultraviolet radiation, and a beta-binomial model of survival  
201 predicted by infection rate and infection severity (Figure 5). All sub-models included site as a random  
202 effect, and only individuals that were not parasitized and were scored for infection severity were  
203 included in the analysis (N=198). Standardized coefficients were calculated using the latent-theoretic  
204 method (Grace, Johnson, Lefcheck, & Byrnes, 2018).

205 Beta-binomial and beta generalized linear mixed models were fitted using glmmTMB (Brooks  
206 et al., 2017)□. Cumulative link mixed models were fitted using the ordinal package (Christensen,  
207 2019). Piecewise structural equation models were fit using piecewiseSEM v. 1.2.1 (Lefcheck, 2016),  
208 and component models were fit using glmmTMB. Ultraviolet radiation was logged and scaled to  
209 improve model convergence. We checked for multicollinearity in models using VIFs;  
210 multicollinearity was low to moderate in all models (<6) except for same year density in models of  
211 infection severity (VIF from 10.5-11.5). Since we included same year density as a control variable, we  
212 kept these models as is despite high VIFs. Plots were generated using ggplot2 (Wickham, 2009),  
213 ggeffects (Lüdtke, 2018), and viridis (Garnier, 2018). All analysis and plotting were conducted in R  
214 v. 3.6.3 (R Development Core Team 2020).

## 215 **Results**

### 216 *Infection rate*

217 The probability of infection increased with log density in the previous year in models of  
218 infection rate (Table 1, Figure 2a). Infection rate had little relation to log density in the current year or  
219 to ultraviolet radiation over the season when environmental OBs could have been exposed (Table 1,  
220 Figure 2b).

### 221 *Infection severity*

222 Log density in the previous year increased infection severity in models of infection severity that  
223 included both infected and uninfected caterpillars but this effect was weakened when ultraviolet

224 radiation was included in the model (Table 1, Figure 3a,b). This effect of ultraviolet radiation may  
225 have been due to low power or to a negative correlation between log density in the previous year and  
226 ultraviolet radiation (Pearson's  $r$ : -0.53). Ultraviolet radiation decreased infection severity when  
227 included (Table 1, Figure 3c,d). In models that included only infected caterpillars, density in the  
228 current and previous years had little effect on infection severity, and ultraviolet radiation had a negative  
229 effect on infection severity (Table 1).

### 230 *Survival to adult emergence*

231 Survival to adult emergence decreased with log density in the previous year and with the  
232 number of emerged parasites. Survival increased in response to density in the current year, and in  
233 response to ultraviolet radiation (Table 1, Figure 4).

### 234 *Structural equation model*

235 We hypothesized a causal model linking ultraviolet radiation and disease to caterpillar survival  
236 (Fig. 5). Shipley's d-separation test (Shipley, 2000) indicated that our structural equation model was  
237 correctly specified (Fig. 5, Fisher's  $C = 7.38$ ,  $df = 6$ ,  $P = 0.288$ ), meaning that there were no missing  
238 paths in our causal model. The model results showed that the negative effect of log density in the  
239 previous year on survival was mediated by infection rate and infection severity and that the effect of  
240 ultraviolet radiation on caterpillar survival was mediated by infection severity (Fig 5). The relative  
241 indirect positive effect size of log density in the previous year was ~2.5x greater than the positive effect  
242 of ultraviolet radiation on survival (-0.085 vs. 0.035, calculated by multiplying path coefficients).

### 243 **Discussion**

244 Overall, our results show that log density during the previous year increased infection rate and  
245 infection severity and decreased survival to adult emergence, suggesting a strong delayed density-  
246 dependent effect of disease on caterpillar population dynamics. The effect of delayed density on both  
247 infection rate and infection severity in univariate models and the result of the structural equation model  
248 suggest that the effect of density on survival acts through infection severity as well as infection rate.

249 This is likely due to dose-dependent infection severity, in which caterpillars that are exposed to more  
250 viral occlusion bodies develop more severe infections that result in death (Cabodevilla et al., 2011;  
251 Eberle, Asser-Kaiser, Sayed, Nguyen, & Jehle, 2008; Matthews, Smith, & Edwards, 2002).

252 In contrast, log density in the current year, representing direct density-dependence, had no effect  
253 on infection rate, a marginal negative effect on infection severity, and a positive effect on survival to  
254 adult emergence. Though inconsistent, this positive effect may have been due to ascertainment bias:  
255 sites that had larger viral outbreaks may have already declined in density over the course of the larval  
256 season (summer 2019-spring 2020). Therefore, density at the time of collection had potentially a  
257 reversed relationship to environmental OB density: sites that had declined from earlier high densities  
258 would have higher levels of OB, resulting in more severe infections and a higher probability of death.  
259 Overall, our results indicated negative delayed density dependence and weak or positive direct density-  
260 dependence consistent with the second-order, oscillatory population dynamics observed in the system  
261 over the long term (Pepi, Holyoak & Karban, unpublished analyses).

262 Ultraviolet radiation by contrast had no detectable effect on infection rate but reduced infection  
263 severity and increased survival. The reduction in infection severity was even greater when only infected  
264 individuals were considered. The effect of ultraviolet radiation on infection severity and survival but  
265 not infection results may represent dose-dependent effects of exposure to OBs. Specifically, at sites  
266 with higher ultraviolet radiation, more viral OBs were likely inactivated before caterpillars could be  
267 exposed to them, so caterpillars received smaller doses of virus and thus became less severely infected  
268 and were more likely to survive.

269 The observational nature of our study gives it some strengths and weaknesses. Our study is one  
270 of few to show delayed-density dependent viral infection in the field, and the only study to show effects  
271 of radiation on viral infection in a natural population of insects. Our results provide validation in a  
272 field system to laboratory studies of virus dynamics and inactivation effects of ultraviolet radiation on  
273 viruses (e.g., Bjørnstad et al., 1998; Witt & Stairs, 1975). Despite highly variable conditions between

274 sites, which were spread across a gradient of over 1000 km, we were able to detect clear effects of  
275 delayed density on infection rate, severity, and survival to adulthood, and of ultraviolet radiation on  
276 infection severity and survival to adulthood. We were also able to use structural equation modelling to  
277 show that infection rate and severity mediate the effect of delayed density and ultraviolet radiation on  
278 survival and strengthen the inferences made from our observational study.

279         Density in the previous year was a strong predictor of infection rates in populations (Fig 2).  
280 This finding makes sense because there must have been a large enough population of hosts in the  
281 previous year for the disease to spread and produce sufficient inoculum to persist into the current year.  
282 Density in the previous year also affected infection severity (Fig 3), but this effect became much  
283 weaker when ultraviolet radiation was included in models and even weaker when only infected  
284 caterpillars were considered. In the structural equation model, infection severity was well explained by  
285 infection rate because individuals must be infected to have high infection severity. This result may be  
286 due to the conflation of infection rate and infection severity in the model since the same dose-  
287 dependent mechanism may have caused them. However, in all models of infection severity that  
288 included both ultraviolet radiation and delayed density, the effect of delayed density, beyond whether  
289 individuals were infected or not, was weaker than the effects of ultraviolet radiation. Thus when effects  
290 on infection severity were detected they may have in fact been generated by the spurious negative  
291 relationship between delayed density and ultraviolet radiation. In contrast to infection severity,  
292 ultraviolet radiation had no significant effect on infection rate. Ultimately, both delayed density and  
293 ultraviolet radiation had strong and opposing effects on survival to adulthood, though the effect of  
294 density in the previous year was much greater in magnitude. The effects of delayed density on survival  
295 were mediated through infection with limited evidence of direct effect on infection severity. In contrast  
296 the effects of ultraviolet radiation on survival were mediated entirely through effects on infection  
297 severity.

298 A possible explanation for the finding that infection rates are primarily determined by host  
299 density in the previous year but not by ultraviolet radiation is that viral infection may be determined in  
300 part through vertical transmission (Burden, Griffiths, Cory, Smith, & Sait, 2002; Cabodevilla et al.,  
301 2011; Cory, 2015; Cory & Myers, 2003). In particular, vertical transmission is likely to occur in *A.*  
302 *virginalis* through persistent sub-lethal infections. We regularly observed OB in egg samples in adult  
303 dissections, and thus eggs of adults with sublethal infections are likely contaminated with virus.  
304 Vertical transmission represents a mechanism through which density in the previous year might  
305 influence infection rates in the following year but is not subject to influence from ultraviolet radiation.  
306 In this way, vertical transmission may maintain higher infection rates after high-density years with  
307 epizootics, even if ultraviolet radiation attenuates inoculum in the environment (Cabodevilla et al.,  
308 2011). Sublethal infections may represent another means by which granulovirus affects population  
309 dynamics by imposing fitness costs on adults (Cabodevilla et al., 2011; Matthews et al., 2002;  
310 Rothman, 1997), although we did not measure this in the present study.

311 In summary, we demonstrated population-level delayed density-dependent effects on viral  
312 infection rate, infection severity, and survival to the reproductive stage, showing how viral infection  
313 may drive cyclic dynamics in insects. We also showed for the first time that ultraviolet radiation may  
314 influence disease dynamics and ultimately population dynamics of insects, through decreased infection  
315 severity and increased survival rates. This provides support for the proposal that viral epizootics may  
316 be an important mechanism driving cyclic dynamics of insects and Lepidoptera in particular (Myers &  
317 Cory, 2013). Our findings also suggest that ultraviolet radiation may be an important factor to consider  
318 as a driver of insect viral disease in the context of global change. In particular, long-term changes in  
319 atmospheric transmittance of solar radiation, or “global dimming and brightening,” have been observed  
320 and are potentially anthropogenic in origin (Wild, 2016). Such long-term changes may have the  
321 potential to influence insect viral disease and population dynamics through changing levels of  
322 ultraviolet attenuation of viral inoculum (Haynes et al., 2018).

## 323 **Acknowledgements**

324 We would like to thank Marcel Holyoak, Jenny Cory, and Jay Rosenheim for helpful comments  
325 on the manuscript. We would also like to thank California State Parks, Ben Becker at Point Reyes  
326 National Seashore, Kristen Ward at Golden Gate National Recreation Area, Jackie Sones at Bodega  
327 Marine Reserve, Brendan Leigh at Humboldt Bay NWR, Karlee Jewell at North Coast Landtrust,  
328 Diane Steeck at the City of Eugene, Grey Wolf at the City of Salem, Oregon Metro Parks, and Christian  
329 Haaning at the City of Portland for assistance and access to field sites. We would also like to thank  
330 Harry Kaya for assistance with identifying the granulovirus, Jay Rosenheim for the use of incubators,  
331 Neal Williams for the use of compound microscopes, and Claire Beck and Jasmine Daragahi for help  
332 with rearing caterpillars. The research was funded by NSF-LTREB-1456225 and an NSF REU  
333 supplement (DEB-2018169).

## 334 **Author contributions**

335 AP, VP, and RK conceived the study. AP and VP collected the data and conducted the analyses.  
336 AP wrote the manuscript. All authors contributed critically to the drafts and approved final publication.

## 337 **Data Availability**

338 Data will be archived on KNB upon acceptance.

## 339 **References**

340 Akhanaev, Y. B., Belousova, I. A., Ershov, N. I., Nakai, M., Martemyanov, V. V., & Glupov, V. V.

341 (2017). Comparison of tolerance to sunlight between spatially distant and genetically different  
342 strains of *Lymantria dispar* nucleopolyhedrovirus. *Plos One*, *12*(12), e0189992.

343 Anderson, R. M., & May, R. M. (1980). Infectious Diseases and Population Cycles of Forest Insects.  
344 *Science*, *210*(4470), 658–661.

345 Anderson, R. M., & May, R. M. (1981). The population dynamics of microparasites and their  
346 invertebrate hosts. *Philosophical Transactions of the Royal Society B: Biological Sciences*,  
347 *291*(1054), 451–519.

- 348 Barrett, J. W., Brownwright, A. J., Primavera, M. J., & Palli, S. R. (1998). Studies of the  
349 nucleopolyhedrovirus infection process in insects by using the green fluorescence protein as a  
350 reporter. *Journal of Virology*, 72(4), 3377–3382.
- 351 Berryman, A. A. (1996). What causes population cycles of forest Lepidoptera? *Trends in Ecology and*  
352 *Evolution*, 11(1), 28–32. doi: 10.1016/0169-5347(96)81066-4
- 353 Bjørnstad, O. N., Begon, M., Stenseth, N. C., Falck, W., Sait, S. M., & Thompson, D. J. (1998).  
354 Population dynamics of the indian meal moth: Demographic stochasticity and delayed regulatory  
355 mechanisms. *Journal of Animal Ecology*, 67(1), 110–126. doi: 10.1046/j.1365-2656.1998.00168.x
- 356 Brooks, M. E., Kristensen, K., van Benthem, K. J., Magnusson, A., Berg, C. W., Nielsen, A., ... Bolker,  
357 B. M. (2017). glmmTMB balances speed and flexibility among packages for zero-inflated  
358 generalized linear mixed modeling. *R Journal*, 9(2), 378–400. doi: 10.32614/rj-2017-066
- 359 Burden, J. P., Griffiths, C. M., Cory, J. S., Smith, P., & Sait, S. M. (2002). Vertical transmission of  
360 sublethal granulovirus infection in the Indian meal moth, *Plodia interpunctella*. *Molecular*  
361 *Ecology*, 11(3), 547–555.
- 362 Burthe, S., Telfer, S., Lambin, X., Bennett, M., Carslake, D., Smith, A., & Begon, M. (2006). Cowpox  
363 virus infection in natural field vole *Microtus agrestis* populations: Delayed density dependence  
364 and individual risk. *Journal of Animal Ecology*, 75(6), 1416–1425. doi: 10.1111/j.1365-  
365 2656.2006.01166.x
- 366 Cabodevilla, O., Villar, E., Virto, C., Murillo, R., Williams, T., & Caballero, P. (2011). Intra- and  
367 intergenerational persistence of an insect nucleopolyhedrovirus: Adverse effects of sublethal  
368 disease on host development, reproduction, and susceptibility to superinfection. *Applied and*  
369 *Environmental Microbiology*, 77(9), 2954–2960. doi: 10.1128/AEM.02762-10
- 370 Christensen, R. H. B. (2019). *ordinal—Regression Models for Ordinal Data*.
- 371 Cory, J. S. (2015). Insect virus transmission: different routes to persistence. *Current Opinion in Insect*  
372 *Science*, 8, 130–135.

- 373 Cory, J. S., & Myers, J. H. (2003). The Ecology and Evolution of Insect Baculoviruses. *Annual Review*  
374 *of Ecology, Evolution, and Systematics*, 34, 239–272. doi:  
375 10.1146/annurev.ecolsys.34.011802.132402
- 376 Eberle, K. E., Asser-Kaiser, S., Sayed, S. M., Nguyen, H. T., & Jehle, J. A. (2008). Overcoming the  
377 resistance of codling moth against conventional *Cydia pomonella* granulovirus (CpGV-M) by a  
378 new isolate CpGV-II2. *Journal of Invertebrate Pathology*, 98(3), 293–298. doi:  
379 10.1016/j.jip.2008.03.003
- 380 English-Loeb, G. M., Karban, R., & Brody, A. K. (1990). Arctiid larvae survive attack by a tachinid  
381 parasitoid and produce viable offspring. *Ecological Entomology*, 15(3), 361–362.
- 382 Fleming, S. B., Kalmakoff, J., Archibald, R. D., & Stewart, K. M. (1986). Density-dependent virus  
383 mortality in populations of *Wiseana* (Lepidoptera: Hepialidae). *Journal of Invertebrate Pathology*,  
384 48(2), 193–198. doi: 10.1016/0022-2011(86)90123-0
- 385 Fuxa, J. R. (2004). Ecology of insect nucleopolyhedroviruses. *Agriculture, Ecosystems & Environment*,  
386 103(1), 27–43.
- 387 Garnier, S. (2018). *viridis: Default Color Maps from “matplotlib.”* Retrieved from [https://cran.r-](https://cran.r-project.org/package=viridis)  
388 [project.org/package=viridis](https://cran.r-project.org/package=viridis)
- 389 Grace, J. B., Johnson, D. J., Lefcheck, J. S., & Byrnes, J. E. K. (2018). Quantifying relative  
390 importance: computing standardized effects in models with binary outcomes. *Ecosphere*, 9(6),  
391 e02283.
- 392 Griego, V. M., Martignoni, M. E., & Claycomb, A. E. (1985). Inactivation of nuclear polyhedrosis virus  
393 (Baculovirus subgroup A) by monochromatic UV radiation. *Applied and Environmental*  
394 *Microbiology*, 49(3), 709–710. doi: 10.1128/aem.49.3.709-710.1985
- 395 Haynes, K. J., Tardif, J. C., & Parry, D. (2018). Drought and surface-level solar radiation predict the  
396 severity of outbreaks of a widespread defoliating insect. *Ecosphere*, 9(8). doi: 10.1002/ecs2.2387
- 397 Hovila, J., Arola, A., & Tamminen, J. (2014). *OMI/Aura Surface UVB Irradiance and Erythematol Dose*



- 398 *Daily L2 Global Gridded 0.25 degree x 0.25 degree V3*,. NASA Goddard Space Flight Center,  
399 Goddard Earth Sciences Data and Information Services Center. doi:  
400 10.5067/Aura/OMI/DATA2028
- 401 Karban, R., & de Valpine, P. (2010). Population dynamics of an Arctiid caterpillar-tachinid parasitoid  
402 system using state-space models. *Journal of Animal Ecology*, 79(3), 650–661. doi: 10.1111/j.1365-  
403 2656.2010.01664.x
- 404 Karban, R., Karban, C., Huntzinger, M., Pearse, I. S., & Crutsinger, G. M. (2010). Diet mixing  
405 enhances the performance of a generalist caterpillar , *Platyprepia virginalis*. *Ecological*  
406 *Entomology*, 35, 92–99. doi: 10.1111/j.1365-2311.2009.01162.x
- 407 Lacey, L. A., & Solter, L. F. (2012). Initial handling and diagnosis of diseased invertebrates. In L. A.  
408 Lacey (Ed.), *Manual of techniques in invertebrate pathology* (2nd ed., pp. 1–14). London, United  
409 Kingdom: Elsevier Ltd.
- 410 Lefcheck, J. S. (2016). piecewiseSEM: Piecewise structural equation modelling in r for ecology,  
411 evolution, and systematics. *Methods in Ecology and Evolution*, 7(5), 573–579. doi: 10.1111/2041-  
412 210X.12512
- 413 Lüdtke, D. (2018). ggeffects: Tidy data frames of marginal effects from regression models. *Journal of*  
414 *Open Source Software*, 3(26), 772.
- 415 Matthews, H. J., Smith, I., & Edwards, J. P. (2002). Lethal and sublethal effects of a granulovirus on  
416 the tomato moth *Lacanobia oleracea*. *Journal of Invertebrate Pathology*, 80(2), 73–80. doi:  
417 10.1016/S0022-2011(02)00100-3
- 418 Myers, J. H. (2000). Population fluctuations of the western tent caterpillar in southwestern British  
419 Columbia. *Population Ecology*, 42(3), 231–241. doi: 10.1007/PL00012002
- 420 Myers, J. H., & Cory, J. S. (2013). Population Cycles in Forest Lepidoptera Revisited. *Annual Review*  
421 *of Ecology, Evolution, and Systematics*, 44(1), 565–592. doi: 10.1146/annurev-ecolsys-110512-  
422 135858

- 423 Myers, J. H., & Cory, J. S. (2016). Ecology and evolution of pathogens in natural populations of  
424 Lepidoptera. *Evolutionary Applications*, 9(1), 231–247. doi: 10.1111/eva.12328
- 425 Olofsson, E. (1988). Environmental persistence of the nuclear polyhedrosis virus of the European pine  
426 sawfly in relation to epizootics in Swedish Scots pine forests. *Journal of Invertebrate Pathology*,  
427 52(1), 119–129. doi: 10.1016/0022-2011(88)90110-3
- 428 Roland, J., & Kaupp, W. J. (1995). Reduced transmission of forest tent caterpillar (Lepidoptera:  
429 Lasiocampidae) nuclear polyhedrosis virus at the forest edge. *Environmental Entomology*, 24(5),  
430 1175–1178. doi: 10.1093/ee/24.5.1175
- 431 Rothman, L. D. (1997). Immediate and delayed effects of a viral pathogen and density on tent  
432 caterpillar performance. *Ecology*, 78(5), 1481–1493. doi: 10.1890/0012-  
433 9658(1997)078[1481:IADEOA]2.0.CO;2
- 434 Sagripanti, J. L., & Lytle, C. D. (2007). Inactivation of influenza virus by solar radiation.  
435 *Photochemistry and Photobiology*, 83(5), 1278–1282. doi: 10.1111/j.1751-1097.2007.00177.x
- 436 Shipley, B. (2000). A New Inferential Test for Path Models Based on Directed Acyclic Graphs A New  
437 Inferential Test for Path Models Based on Directed Acyclic Graphs. *Structural Equation  
438 Modelling*, 7(2), 206–218. doi: 10.1207/S15328007SEM0702
- 439 Turchin, P. (1990). Rarity of density dependence or population regulation with lags? *Nature*,  
440 344(6267), 660–663. doi: 10.1038/344660a0
- 441 Turchin, P. (2003). *Complex Population Dynamics: A Theoretical/Empirical Synthesis*. Princeton:  
442 Princeton University Press.
- 443 Vega, F. E., & Kaya, H. K. (2012). *Insect pathology*. Academic press.
- 444 Wickham, H. (2009). *ggplot2: elegant graphics for data analysis*. New York: Springer.
- 445 Wild, M. (2016). Decadal changes in radiative fluxes at land and ocean surfaces and their relevance for  
446 global warming. *Wiley Interdisciplinary Reviews: Climate Change*, 7(1), 91–107. doi:  
447 10.1002/wcc.372

448 Witt, D. J., & Stairs, G. R. (1975). The effects of ultraviolet irradiation on a Baculovirus infecting  
449 *Galleria mellonella*. *Journal of Invertebrate Pathology*, 26(3), 321–327. doi: 10.1016/0022-  
450 2011(75)90229-3  
451  
452  
453  
454  
455  
456  
457  
458  
459  
460  
461  
462  
463  
464  
465  
466  
467  
468  
469  
470  
471  
472

473 **Figures & Tables**

474 **Table 1.** Results of univariate models.

| Model structure                                 | Parameter                        | Logit $\beta \pm 1$ SE | z            | P             |
|-------------------------------------------------|----------------------------------|------------------------|--------------|---------------|
| Infection ~ log density                         | Log density current year         | -0.20±0.38             | -0.52        | 0.603         |
|                                                 | <b>Log density previous year</b> | <b>0.55±0.26</b>       | <b>2.10</b>  | <b>0.036</b>  |
| Infection ~ log density + ultraviolet           | Log density current year         | -0.10±0.39             | -0.25        | 0.802         |
|                                                 | <b>Log density previous year</b> | <b>0.92±0.46</b>       | <b>1.998</b> | <b>0.046</b>  |
|                                                 | Ultraviolet radiation            | 0.66±0.58              | 1.13         | 0.259         |
| Severity ~ log density                          | Log density current year         | -0.28±0.19             | -1.49        | 0.135         |
|                                                 | <b>Log density previous year</b> | <b>0.26±0.11</b>       | <b>2.35</b>  | <b>0.019</b>  |
| Severity ~ log density + ultraviolet            | Log density current year         | -0.28±0.18             | -1.61        | 0.101         |
|                                                 | Log density previous year        | 0.16±0.11              | 1.37         | 0.170         |
|                                                 | <b>Ultraviolet radiation</b>     | <b>-0.35±0.17</b>      | <b>-2.04</b> | <b>0.041</b>  |
| Severity   infected ~ log density               | Log density current year         | -0.27±0.19             | -1.39        | 0.163         |
|                                                 | Log density previous year        | 0.018±0.11             | 1.66         | 0.096         |
| Severity   infected ~ log density + ultraviolet | Log density current year         | -0.28±0.18             | -1.52        | 0.129         |
|                                                 | Log density previous year        | 0.06±0.12              | 0.48         | 0.631         |
|                                                 | <b>Ultraviolet radiation</b>     | <b>-0.44±0.18</b>      | <b>-2.40</b> | <b>0.017</b>  |
| Survival ~ log density + ultraviolet            | <b>Log density current year</b>  | <b>1.15±0.51</b>       | <b>2.25</b>  | <b>0.024</b>  |
|                                                 | <b>Log density previous year</b> | <b>-0.75±0.31</b>      | <b>-2.39</b> | <b>0.017</b>  |
|                                                 | <b>Ultraviolet radiation</b>     | <b>0.64±0.32</b>       | <b>1.97</b>  | <b>0.049</b>  |
|                                                 | <b>Emerged parasites</b>         | <b>-5.39±1.58</b>      | <b>-3.42</b> | <b>0.0006</b> |

475

476

477

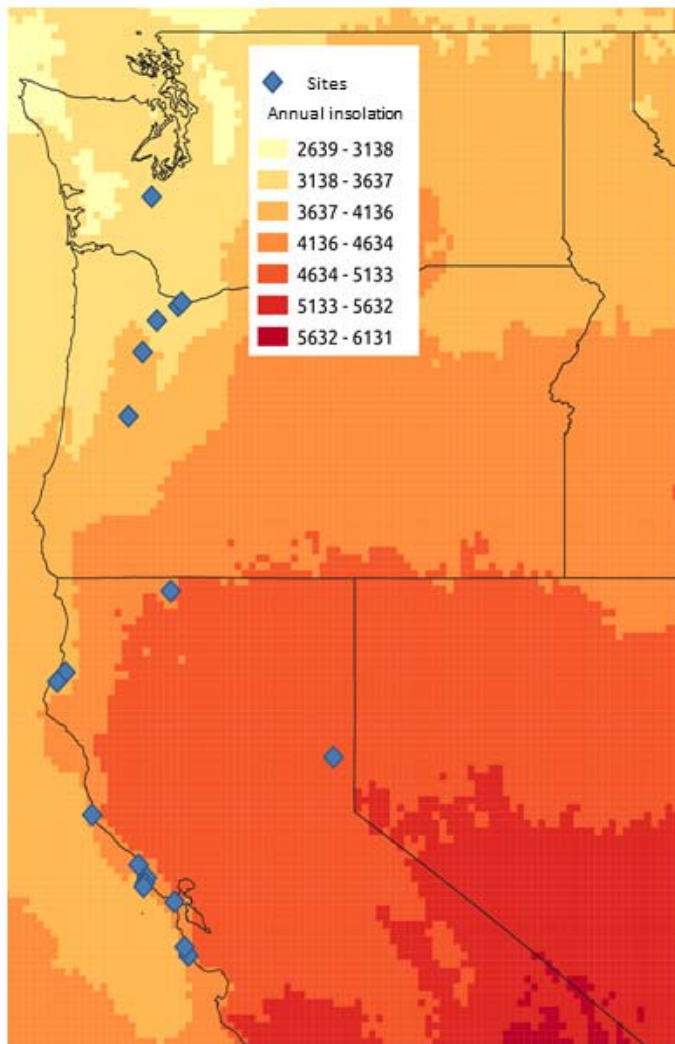

478

479 **Figure 1.** Map of study site locations in Washington, Oregon, and California, overlaid on a map of  
480 average annual insolation (GHI), in kWh/m<sup>2</sup>.

481

482

483

484

485

486

487

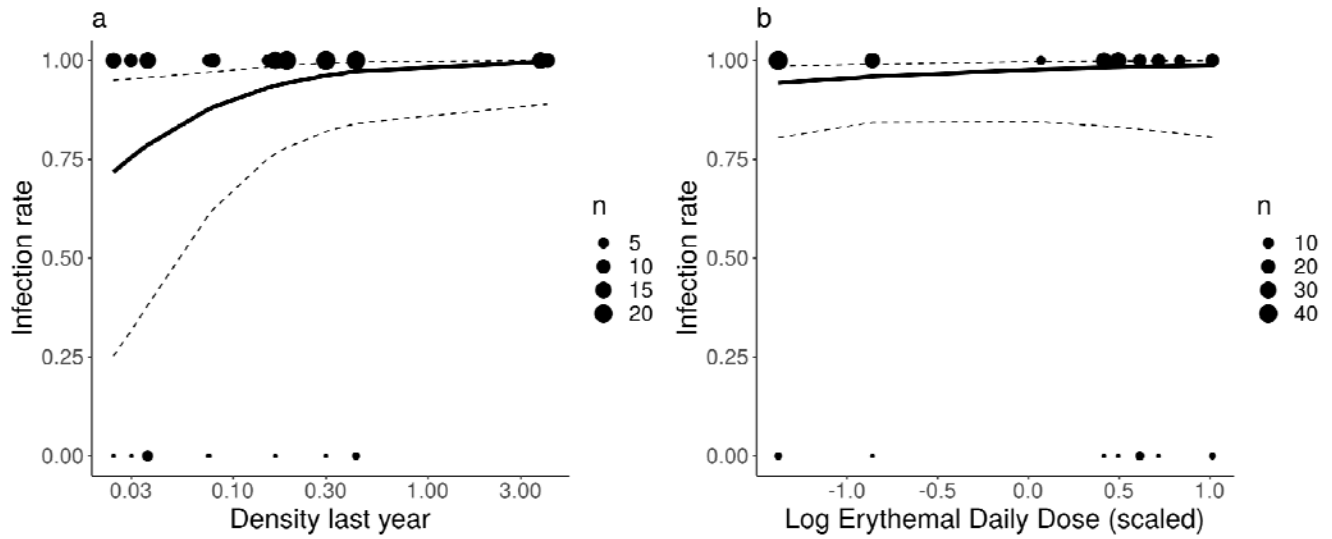

488

489 **Figure 2.** Infection rate in response to (a) density in the previous year and (b) ultraviolet radiation as  
490 scaled log erythemal daily dose in the summer before collection (2019) from beta-binomial generalized  
491 linear mixed models.

492

493

494

495

496

497

498

499

500

501

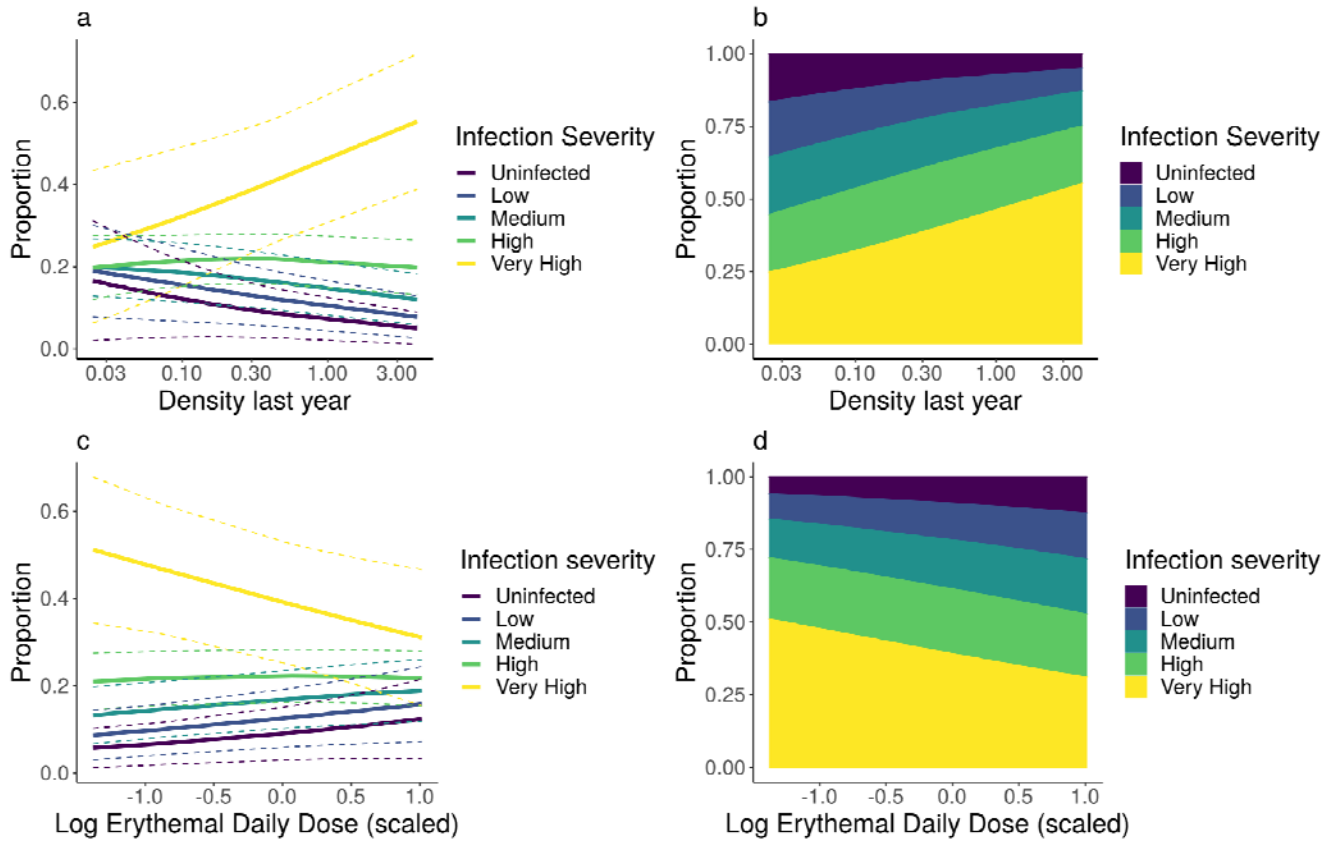

502

503

504

505

506

507

508

509

510

511

512

513

514

515

**Figure 3.** Infection severity in response to (a-b) density in the previous year, and (c-d) ultraviolet radiation as scaled log erythemal daily dose in the summer before collection cumulative link mixed models. The left column (a,c) show model predicted rate of infection at each severity class with 95% confidence intervals, and the right column (b,d) shows the proportion of the total population predicted to be infected at each severity class by color.

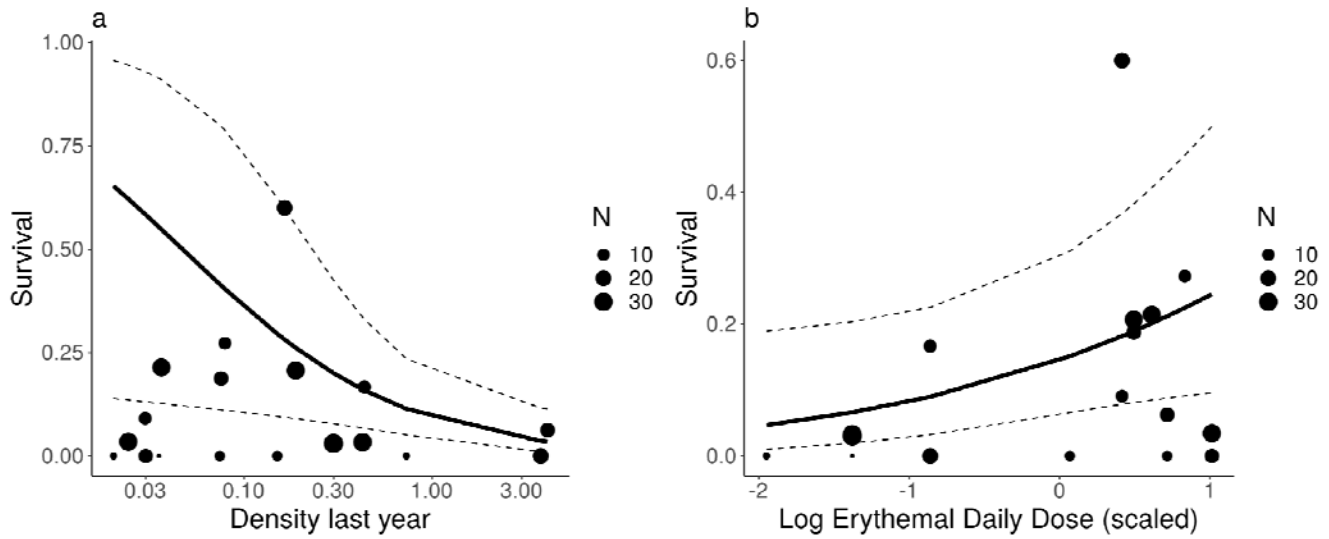



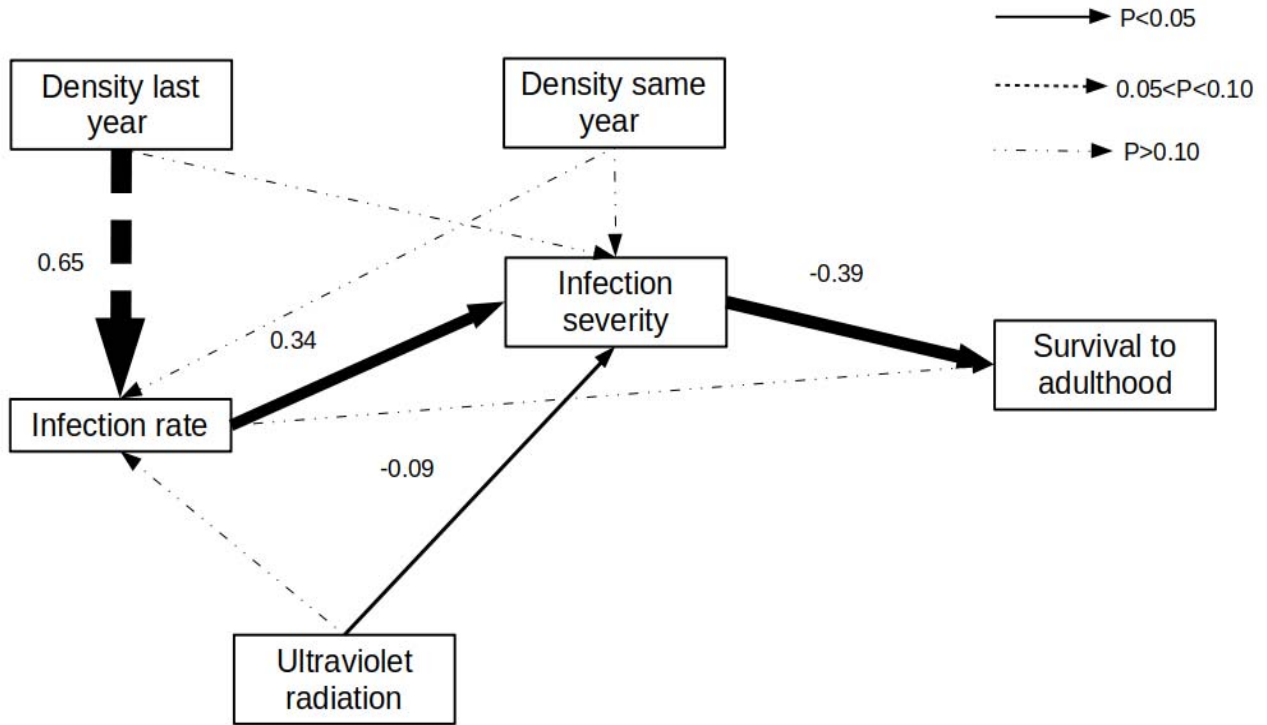

528

529 **Figure 5.** Path diagram of piecewise structural equation model. Size of arrows is proportional to the  
530 standardized path coefficient (shown next to lines), and line type indicates P-value of the path  
531 parameter.

532

533

534

535

536

537

538

539

540

541

542 **Supplement**

543 **Table S1.**

| <b>Site</b>               | <b>Latitude</b> | <b>Longitude</b> | <b>Number reared</b> | <b>Date Collected</b> |
|---------------------------|-----------------|------------------|----------------------|-----------------------|
| Franklin Point, CA        | 37.155          | -122.35          | 29                   | 3/1/2020              |
| Pescadero Marsh, CA       | 37.265          | -122.41          | 16                   | 3/1/2020              |
| Golden Gate NRA, CA       | 37.844          | -122.55          | 28                   | 3/13/2020             |
| Point Reyes South, CA     | 38.038          | -122.99          | 15                   | 3/13/2020             |
| Point Reyes North, CA     | 38.088          | -122.97          | 29                   | 3/13/2020             |
| Point Reyes Kehoe, CA     | 38.153          | -122.94          | 2                    | 3/13/2020             |
| Bodega Marine Reserve, CA | 38.319          | -123.06          | 16                   | 3/27/2020             |
| Manchester State Park, CA | 38.959          | -123.72          | 6                    | 3/27/2020             |
| Loyalton, CA              | 39.700          | -120.30          | 6                    | 5/30/2020             |
| Humboldt NWR, CA          | 40.670          | -124.21          | 20                   | 4/10/2020             |
| Freshwater Farms, CA      | 40.786          | -124.09          | 11                   | 4/10/2020             |
| Klamath River, Yreka, CA  | 41.829          | -122.61          | 11                   | 4/10/2020             |
| Checkermallow Access, OR  | 44.072          | -123.20          | 12                   | 4/11/2020             |
| Fairview Wetland, OR      | 44.895          | -123.00          | 20                   | 4/11/2020             |
| Graham Oaks, OR           | 45.299          | -122.80          | 30                   | 4/11/2020             |
| Powell Butte, OR          | 45.488          | -122.50          | 33                   | 4/11/2020             |
| Salish Ponds, OR          | 45.531          | -122.45          | 1                    | 4/11/2020             |
| West Rocky Prairie, WA    | 46.887          | -122.87          | 2                    | 4/12/2020             |

544

545

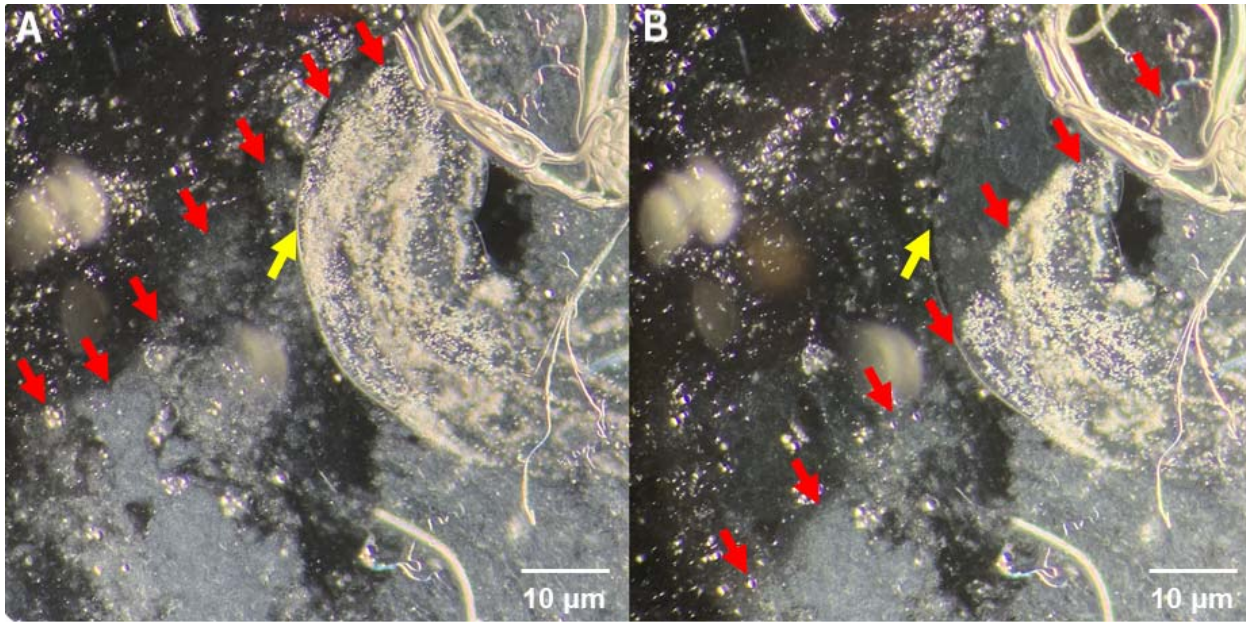

546

547 **Figure S1.** Fat body tissue smear from a caterpillar infected with GV under a light microscope at 200x  
548 magnification with phase contrast. A drop of NaOH was added which moved through the sample. The  
549 red arrows point to the boundary between NaOH solution and water. The yellow arrows point to the  
550 OBs (Figure A) which turned transparent (Figure B) after they were dissolved by the strong base.

551

552

553

554

555

556

557

558

559

560

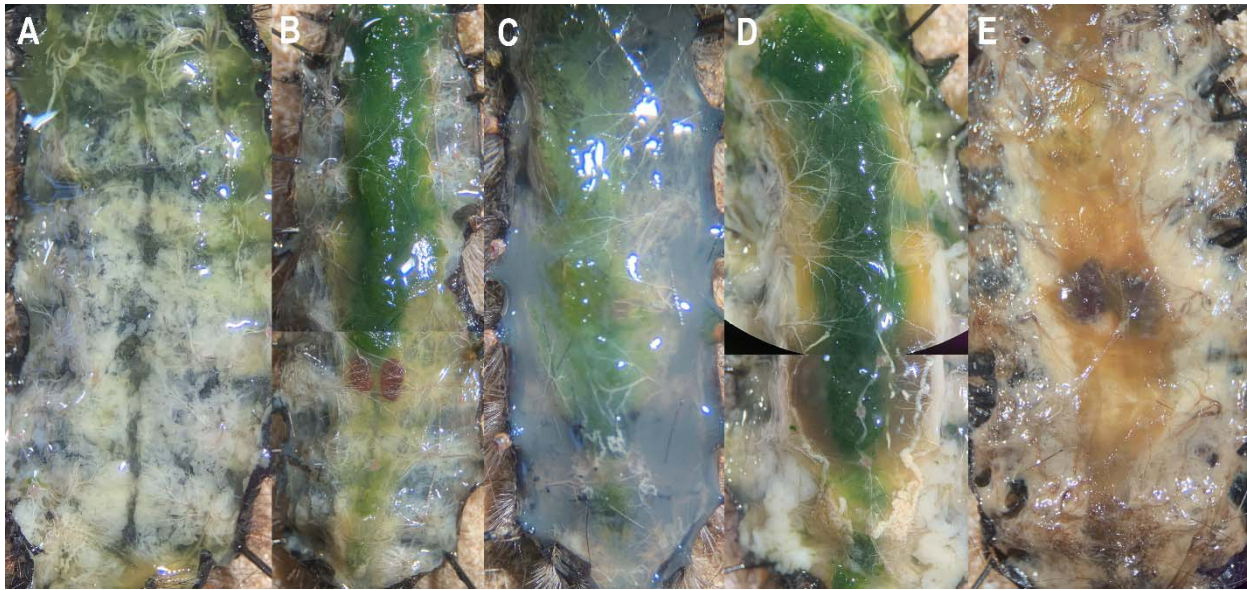

561

562 **Figure S2.** Ventral dissection of late instar *A. virginalis* larva in the order of infection severity, ranging  
563 from (A) uninfected, (B) low severity, (C) medium severity, (D) high severity, to (E) very high severity.

564 The caterpillar's gut in figure A is missing. Caterpillars with higher infection severity have a cloudier  
565 hemolymph and a darker and more yellowish fat body. They also often have large clusters of infected  
566 tissues next to the midgut (e.g. Figure D).

567
